# Supplementary material for: Studying the trend of the novel coronavirus series in Mauritius and its implications
Source: PLoS One. 2020 Jul 10;15(7):e0235730. doi: 10.1371/journal.pone.0235730 (PMC7351213; doi:10.1371/journal.pone.0235730)
Supplement: S2 Text — (CSV) [file pone.0235730.s002.csv]

Date	Month	Year	Infected	Death	Country
24	4	2020	2	0	Mauritius
23	4	2020	1	0	Mauritius
22	4	2020	0	0	Mauritius
21	4	2020	0	0	Mauritius
20	4	2020	3	0	Mauritius
19	4	2020	1	0	Mauritius
18	4	2020	0	0	Mauritius
17	4	2020	0	0	Mauritius
16	4	2020	0	0	Mauritius
15	4	2020	0	0	Mauritius
14	4	2020	0	0	Mauritius
13	4	2020	5	0	Mauritius
12	4	2020	1	0	Mauritius
11	4	2020	4	2	Mauritius
10	4	2020	41	0	Mauritius
9	4	2020	5	0	Mauritius
8	4	2020	24	0	Mauritius
7	4	2020	17	0	Mauritius
6	4	2020	31	0	Mauritius
5	4	2020	10	0	Mauritius
4	4	2020	17	0	Mauritius
3	4	2020	15	2	Mauritius
2	4	2020	11	2	Mauritius
1	4	2020	15	0	Mauritius
31	3	2020	18	0	Mauritius
30	3	2020	8	1	Mauritius
29	3	2020	8	0	Mauritius
28	3	2020	13	0	Mauritius
27	3	2020	33	0	Mauritius
26	3	2020	6	0	Mauritius
25	3	2020	6	0	Mauritius
24	3	2020	8	0	Mauritius
23	3	2020	14	1	Mauritius
22	3	2020	2	1	Mauritius
21	3	2020	9	0	Mauritius
20	3	2020	3	0	Mauritius
